# Supplementary material
Source: publisher site journal article supplement (https://www.dovepress.com/get_supplementary_file.php?f=416182.docx)
Supplement: Supplementary file 1 [file get_supplementary_file.php]

**The PCQ-Infertility revised: A New Digital Instrument to Measure Treatment Satisfaction of Fertility Patients**

**Authors:** Lotte van der Kolk, MSc1, Ellen Smit, BBA2*, Prof. Dr. Josée Bloemer1, and Lise M. van Wijk, MSc2

1 Institute for Management Research, Radboud University, Nijmegen, The Netherlands

2 Ferring B.V., Hoofddorp, The Netherlands

*****Correspondence to:

Ellen Smit

Polarisavenue 130
2132 JX Hoofddorp

Tel: +31 6 208 72 493

Email: ellen.smit@ferring.com

**Questions from the PCQ-Revised**

***Background questions***

1. **What is your highest completed level of education?**

- No education
- Primary school
- GCSE
- NVQ or equivalent
- Level or equivalent
- University (Bachelors)
- University (Masters and higher)
- Other

1. **What treatment are you currently undergoing or have you just completed?**

- I have not yet started treatment
- Ovulation induction (triggering of ovulation)
- IUI (inseminations) with or without hormone stimulation
- IVF or ICSI (test tube fertilisation)
- TESE/PESA/MESA

1. **Are you currently pregnant?**

- No
- Yes

***Dimension ‘Accessibility’***

1. **When I called the clinic, I was able to speak to someone without waiting.**

- Strongly agree
- Agree
- Neutral
- Do not agree
- Strongly disagree
- Not applicable

1. **If I had any questions, I could easily reach the Reproductive Medicine Department (by email or phone).**

- Strongly agree
- Agree
- Neutral
- Do not agree
- Strongly disagree
- Not applicable

***Dimension ‘Information’***

1. **I received clear information on how to reach the Reproductive Medicine Department outside office hours.**

- Strongly agree
- Agree
- Neutral
- Do not agree
- Strongly disagree

1. **I received written and/or digital information in addition to oral information.**

- Strongly agree
- Agree
- Neutral
- Do not agree
- Strongly disagree

1. **The explanations about examinations that were to be carried out on me were clear and understandable.**

- Strongly agree
- Agree
- Neutral
- Do not agree
- Strongly disagree

1. **The explanations about the treatment I was to receive were clear and understandable.**

- Strongly agree
- Agree
- Neutral
- Do not agree
- Strongly disagree

1. **I received a clear and understandable treatment overview with time planning.**

- Strongly agree
- Agree
- Neutral
- Do not agree
- Strongly disagree

1. **I received clear and understandable instructions on how to use the fertility drugs (instructions on how to take or inject them).**

- Strongly agree
- Agree
- Neutral
- Do not agree
- Strongly disagree
- Not applicable

1. **I lacked explanation from members of the treatment team at the following times (multiple answers possible):**

- At the first interview
- For new medicines
- After I received the treatment plan
- Concerning the puncture
- Concerning the transfer
- Concerning the pregnancy test
- I did not lack any explanations

***Dimension ‘Communication’***

1. **The doctor listened to me attentively.**

- Strongly agree
- Agree
- Neutral
- Do not agree
- Strongly disagree

1. **The doctor took me seriously.**

- Strongly agree
- Agree
- Neutral
- Do not agree
- Strongly disagree

1. **The doctor took time for me.**

- Strongly agree
- Agree
- Neutral
- Do not agree
- Strongly disagree

1. **The treatment team was willing to talk to me about mistakes and things that did not go well.**

- Strongly agree
- Agree
- Neutral
- Do not agree
- Strongly disagree
- Not applicable

***Dimension ‘Patient Involvement’***

1. **The doctor was open to my opinion and ideas.**

- Strongly agree
- Agree
- Neutral
- Do not agree
- Strongly disagree

1. **I was given the opportunity to ask the doctor questions.**

- Strongly agree
- Agree
- Neutral
- Do not agree
- Strongly disagree

1. **I was given the opportunity to have a say in my treatment.**

- Strongly agree
- Agree
- Neutral
- Do not agree
- Strongly disagree

***Dimension ‘Respect for patient’s values’***

1. **I had access to my patient file during my course of treatment.**

- No
- Yes

1. **The doctor was interested in my personal situation.**

- Strongly agree
- Agree
- Neutral
- Do not agree
- Strongly disagree

1. **The doctor understood my emotions.**

- Strongly agree
- Agree
- Neutral
- Do not agree
- Strongly disagree

1. **The nurses were understanding of my personal situation.**

- Strongly agree
- Agree
- Neutral
- Do not agree
- Strongly disagree

1. **The treatment team also responded to my partner.**

- Strongly agree
- Agree
- Neutral
- Do not agree
- Strongly disagree
- I do not have a partner

1. **The treatment team addressed the possible emotional consequences of fertility problems.**

- Strongly agree
- Agree
- Neutral
- Do not agree
- Strongly disagree

1. **I received sufficient information from the treatment team about the possibilities of receiving psychological help from a psychologist or social worker.**

- Strongly agree
- Agree
- Neutral
- Do not agree
- Strongly disagree

***Dimension ‘Continuity and transition’***

1. **A contact person in the team was designated whom I could contact at any time (e.g., a doctor or nurse(s)).**

- No
- Yes

1. **I had my own doctor (primary caregiver) with whom I had the most important conversations and made decisions.**

- No
- Yes

1. **I only had to tell my story once within the treatment team.**

- Strongly agree
- Agree
- Neutral
- Do not agree
- Strongly disagree

1. **I received clear and understandable information or recommendations from those treating me.**

- Strongly agree
- Agree
- Neutral
- Do not agree
- Strongly disagree

***Dimension ‘Competence’***

1. **The doctor was well prepared when I went to see him/her for an appointment.**

- Strongly agree
- Agree
- Neutral
- Do not agree
- Strongly disagree

1. **The doctor(s) made a professional impression on me.**

- Strongly agree
- Agree
- Neutral
- Do not agree
- Strongly disagree

1. **The treatment team worked carefully.**

- Strongly agree
- Agree
- Neutral
- Do not agree
- Strongly disagree

1. **The organisation at the fertility centre/clinic went smoothly (well organised).**

- Strongly agree
- Agree
- Neutral
- Do not agree
- Strongly disagree

***Remaining items***

1. **I never had to wait longer than 3 weeks when I wanted to make an appointment with the doctor.**

- Strongly agree
- Agree
- Neutral
- Do not agree
- Strongly disagree

1. **Between my first visit to the fertility centre/clinic and receiving a treatment plan, there were...**

- More than 6 months
- 5 or 6 months
- 3 or 4 months
- 1 or 2 months
- Less than 1 month

1. **How long did you have to wait on average before you could start another treatment due to organisational reasons (for example, due to a waiting list or summer break)?**

- More than 2 months
- 2 months
- 1 month
- Less than 1 month
- I could always start the next treatment immediately
- Not applicable

***To Conclude***

1. **How likely are you to recommend fertility treatment at your fertility centre or clinic to others?**

(1 = Very unlikely, 10 = Very likely)

1. **What grade would you give the overall fertility treatment at your fertility centre or clinic?**

(1 = Very poor, 10 = Very good)

Bottom of Form
